# Supplementary material for: Highly-dispersed Ge quantum dots in carbon frameworks for ultra-long-life sodium ion batteries
Source: Royal Society of Chemistry journal article supplement (doi:10.1039/d1qm00983d), 2021-01-01
Supplement: d1qm00983d1.pdf [file d1qm00983d1.pdf]

## Highly-dispersed Ge quantum dots in carbon frameworks for ultra-long-life sodium ions batteries

Wei Wei<sup>a#</sup>, Yongya Zhang<sup>a#</sup>, Lei Liang<sup>a</sup>, Kefeng Wang<sup>a</sup>, Qingfeng Zhou<sup>a</sup>, Yanli Zhou<sup>a\*</sup>, Hua Wang<sup>b\*</sup>

<sup>a</sup> School of Chemistry and Chemical Engineering, Henan Engineering Center of New Energy Battery Materials, Henan Key Laboratory of Bimolecular Reorganization and Sensing, Shangqiu Normal University, Shangqiu 476000, P. R. China. E-mail: zhouyanli@mails.ucas.ac.cn

<sup>b</sup> School of Chemistry, Beihang University, Beijing 100191, P.R. China, E-mail: wanghua8651@buaa.edu.cn

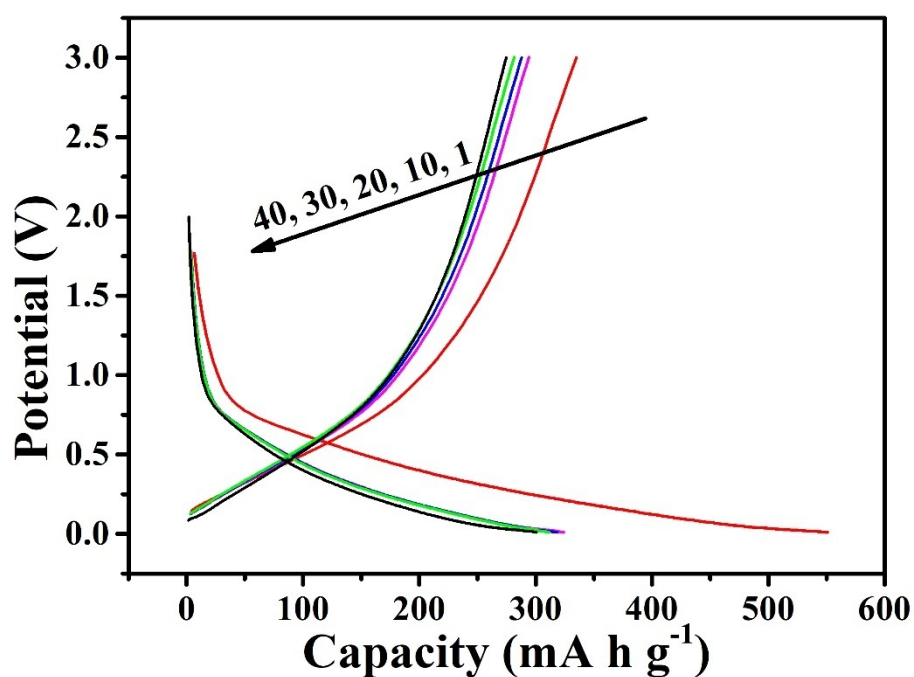

Figure S1. The charge-discharge curves of carbon matrix.

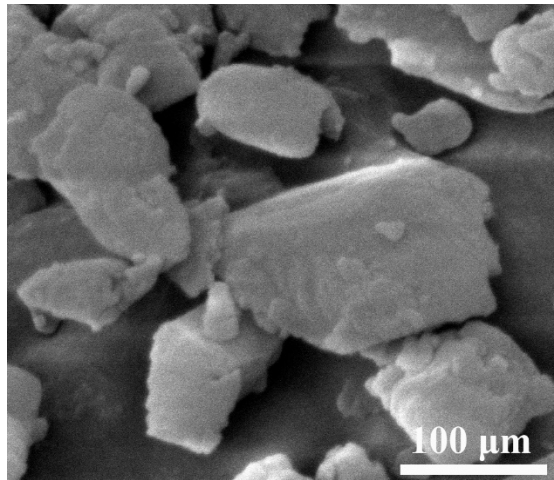

Figure S2. SEM image of commercial bulk Ge powder, it can be seen that Ge powder consists of irregular particles with a particle size range from 10 to 200  $\mu\text{m}$ .

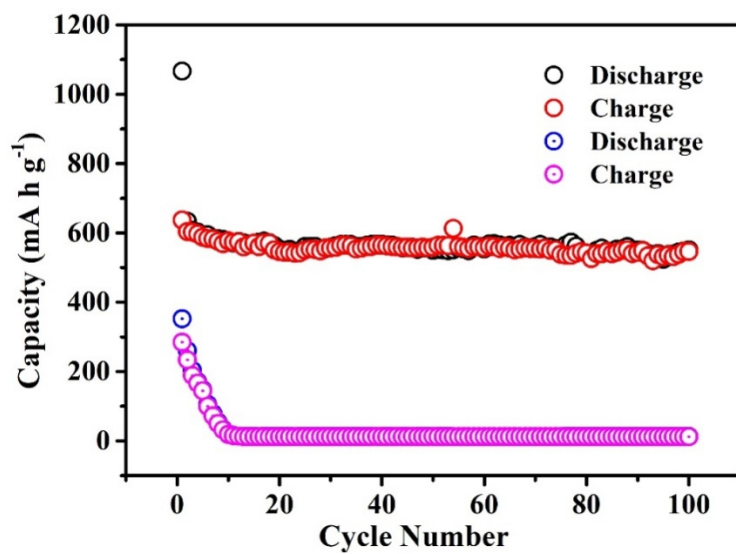

Figure S3. Comparison of capacities vs. cycle number between Ge@C and bulk Ge electrodes.

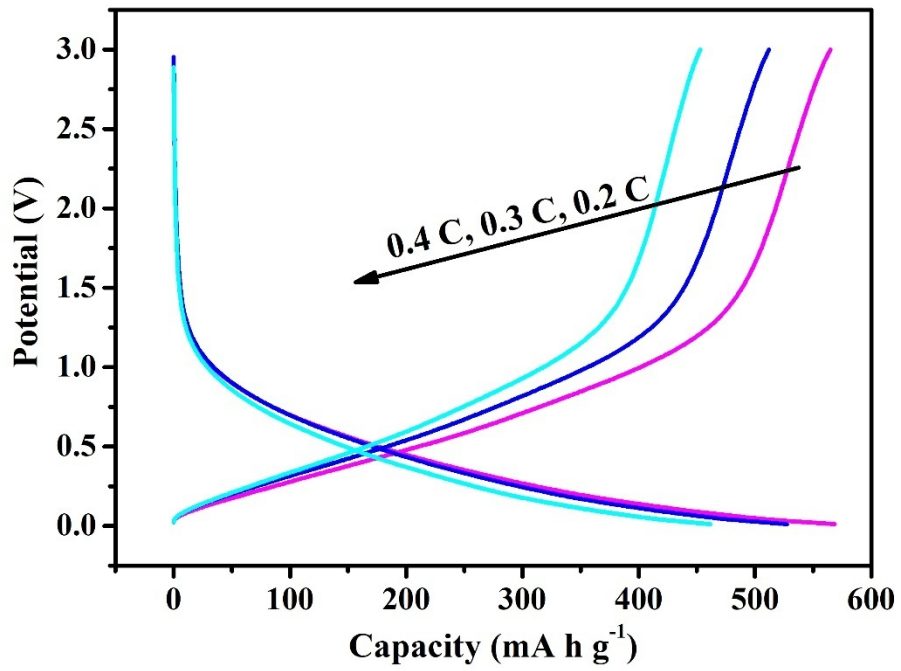

Figure S4. Charge/discharge profiles of Ge@C electrode at current densities of 0.2, 0.3 and 0.4 C (1 C = 500 mA/g).

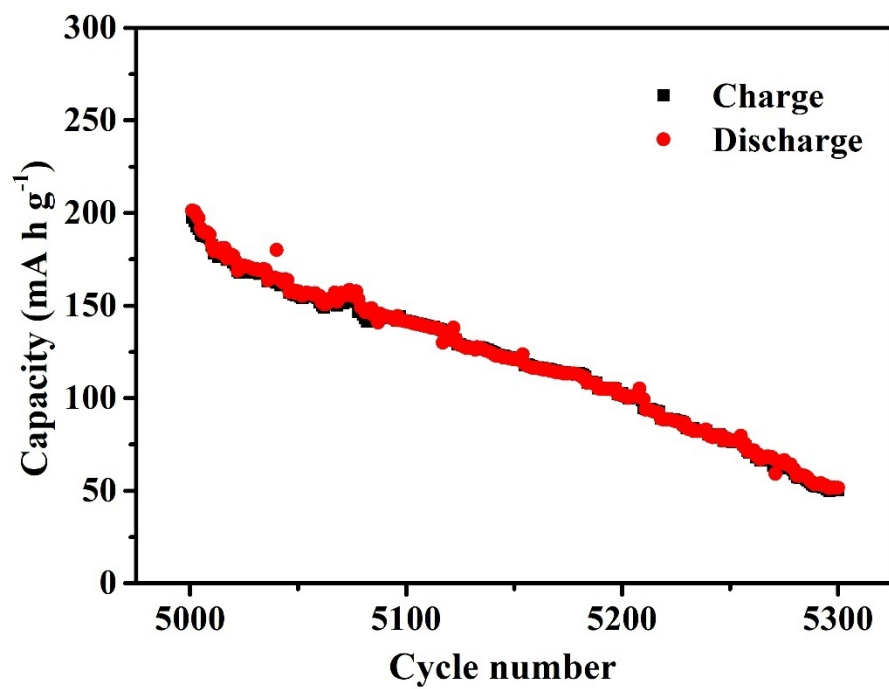

Figure S5. Capacities vs. cycles from 5001 to 5300 under the current density of 3 C.

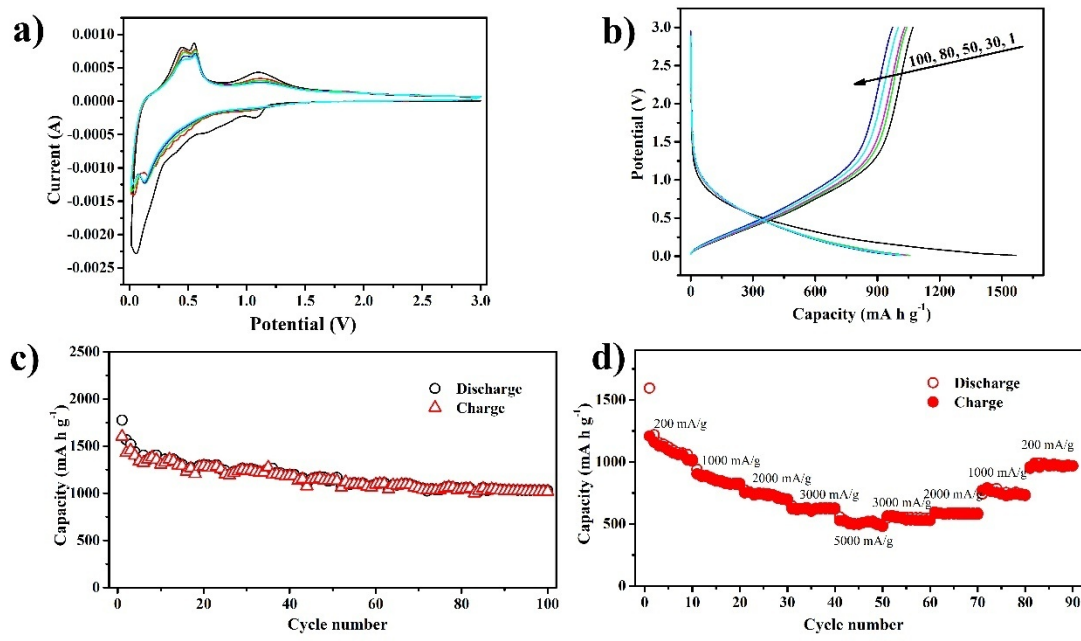

Figure S6. Li storage performance of the Ge@C electrode. (a) Cyclic voltammograms for 1 ~ 5 cycles at a scanning rate of 0.1mV s<sup>-1</sup>; (b) Charge/discharge- profiles for selected cycles under the current density of 200 mA g<sup>-1</sup>; (c) Cycling performance under the current density of 200 mA g<sup>-1</sup>;(d) Rate performance of the Ge@C electrode.
